# Supplementary material for: Demonstration of potential link between Helicobacter pylori related promoter CpG island methylation and telomere shortening in human gastric mucosa
Source: PubMed Central journal article supplement (PMC5190073; doi:10.18632/oncotarget.9764), 2016-06-01
Supplement: oncotarget-07-43989-s001.pdf [file oncotarget-07-43989-s001.pdf]

## Demonstration of potential link between *Helicobacter pylori* related promoter CpG island methylation and telomere shortening in human gastric mucosa

### SUPPLEMENTARY FIGURES AND TABLES

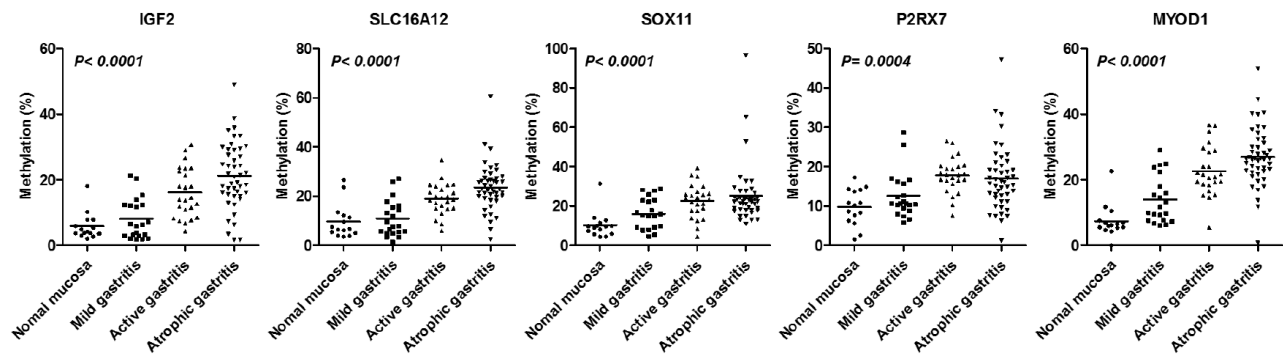

Supplementary Figure S1: Association between methylation status of five PCGIs (*IGF2*, *SLC16A12*, *SOX11*, *P2RX7* and *MYOD1*) and development of pathological state of *H. pylori* related gastritis. The statistical analysis was performed using one way ANOVA.

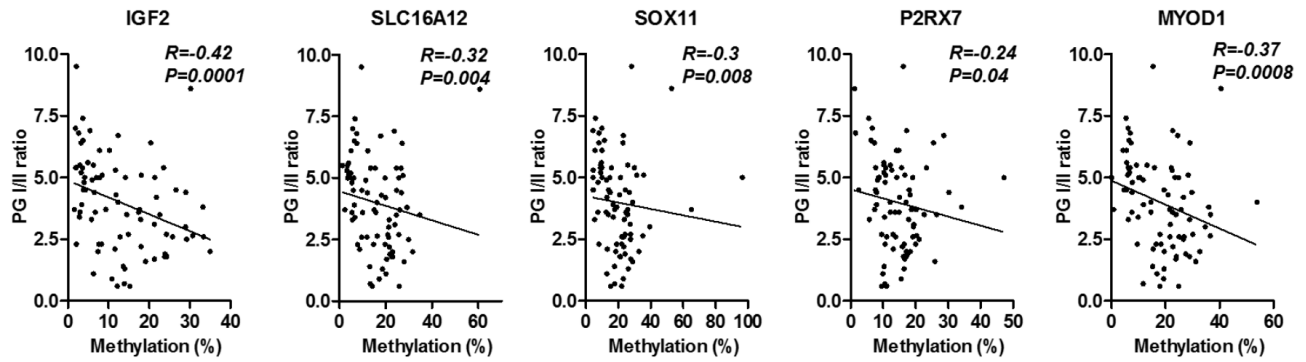

Supplementary Figure S2: Association between methylation status of five PCGIs (*IGF2*, *SLC16A12*, *SOX11*, *P2RX7* and *MYOD1*) and serum pepsinogen (PG) I/II ratio. Statistical analysis was performed using the Spearman correlation analysis.

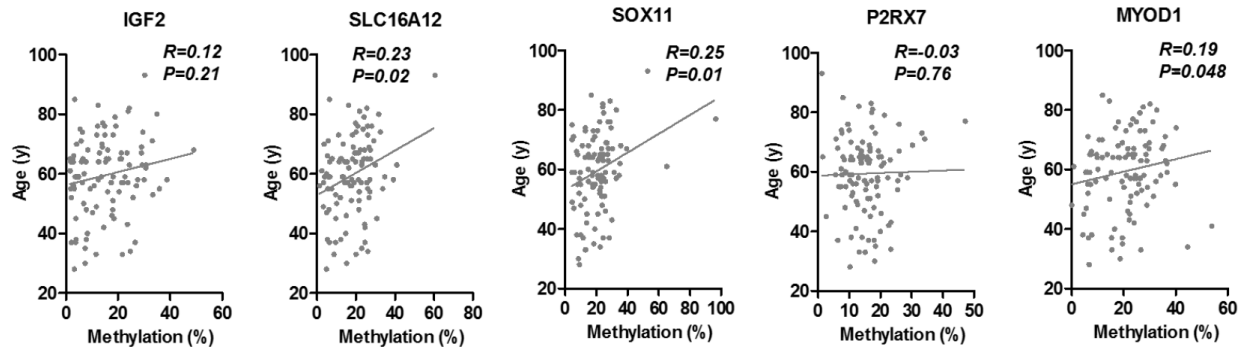

**Supplementary Figure S3: Association between methylation status of five PCGIs (*IGF2*, *SLC16A12*, *SOX11*, *P2RX7* and *MYOD1*) and aging.** Statistical analysis was performed using the Spearman correlation analysis.

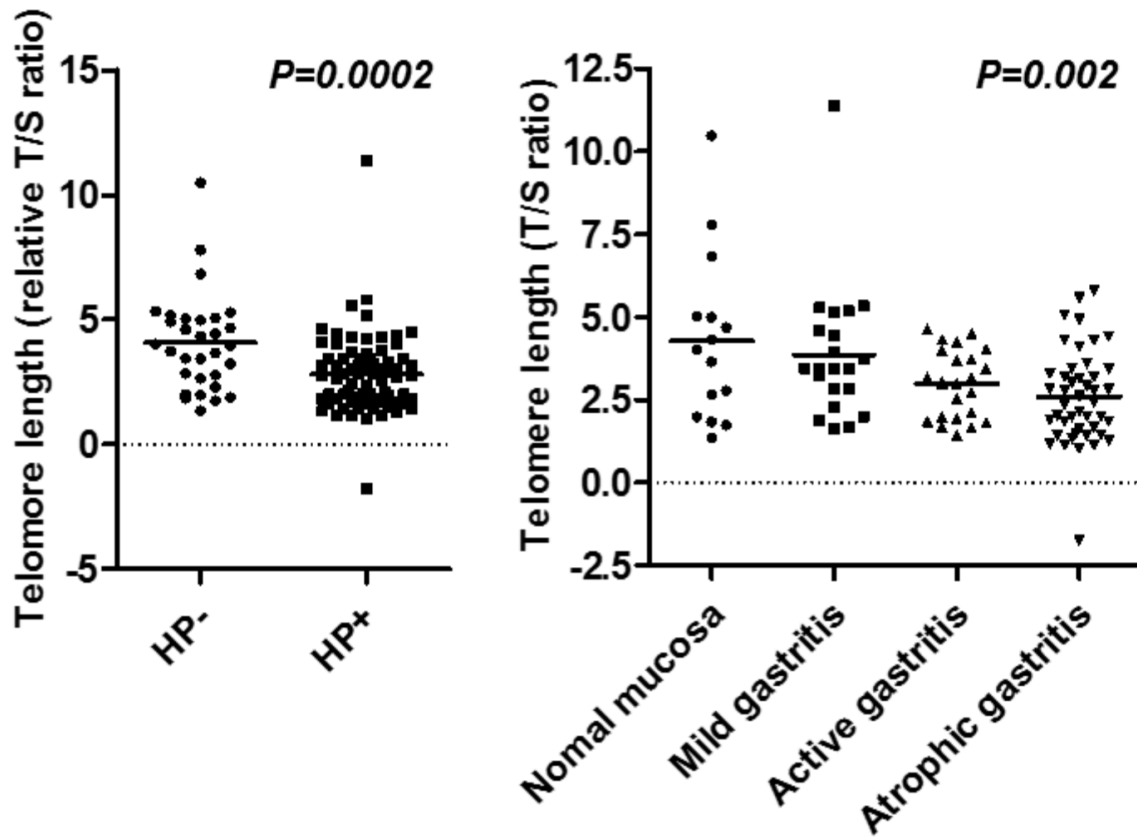

Supplementary Figure S4: Association between telomere shortening and *H. pylori* infection (left) and development of pathological state of *H. pylori* related gastritis (right). The statistical analysis was performed using Student's t-Test (left) and one way ANOVA (right), respectively.

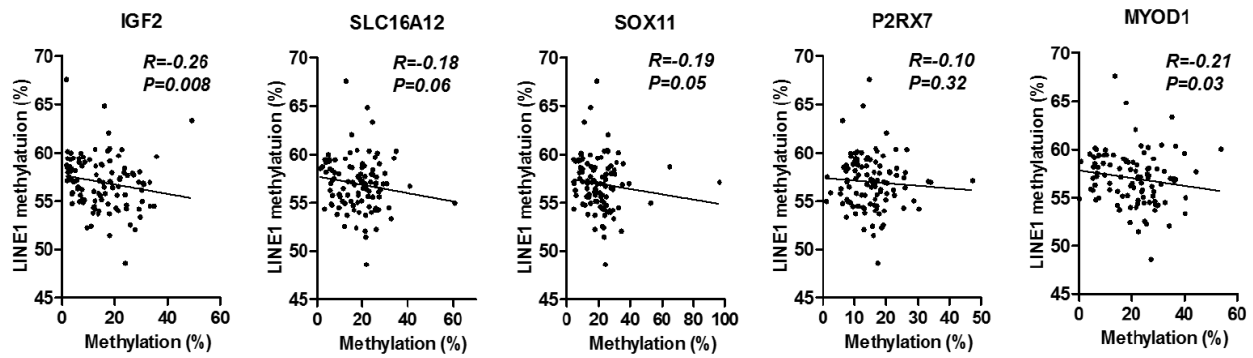

Supplementary Figure S5: Association between methylation status of five PCGIs (*IGF2*, *SLC16A12*, *SOX11*, *P2RX7* and *MYOD1*) and *LINE1* repetitive element. Statistical analysis was performed using the Spearman correlation analysis.

**Supplementary Table S1: Primer sequences used in pyrosequencing**

See Supplementary File 1

**Supplementary Table S2: Primer sequences used in telomere length measurement**

| <b>Assay name</b>  | <b>Forward primer</b>                      | <b>Reverse primer</b>                       |
|--------------------|--------------------------------------------|---------------------------------------------|
|                    | sequence                                   | sequence                                    |
| <i>Telomere</i>    | CGGTTTGTTGGGTTTGGGTT<br>TGGGTTTGGGTTTGGGTT | GGCTTGCCTTACCCTTACCCTTA<br>CCCTTACCCTTACCCT |
| <i>Beta-globin</i> | GCTTCTGACACAACCTGTGTTCACTAGC               | CACCAACTTCATCCACGTTCCACC                    |
